1     **Lesion site and therapy time predict responses to a therapy for anomia after stroke:**  
2                                 **a prognostic model development study**

3  
4             Thomas M.H. Hope<sup>1,2\*</sup>, PhD, Davide Nardo<sup>1,3</sup>, PhD, Rachel Holland<sup>4</sup>, PhD, Sasha  
5     Ondobaka<sup>1</sup>, PhD, Haya Akkad<sup>1</sup> MSc, Cathy J. Price, PhD<sup>2</sup>, Alexander P. Leff<sup>1,5</sup>, PhD, Jenny  
6                                 Crinion<sup>1</sup>, PhD.

- 7             1. Institute of Cognitive Neuroscience, University College London, UK.  
8             2. Wellcome Centre for Human Neuroimaging, University College London, UK  
9             3. MRC Cognition and Brain Sciences Unit, Cambridge University, UK  
10            4. Division of Language and Communication Sciences, City University London, UK.  
11            5. UCL Queen Square Institute of Neurology, London, UK

12  
13                                 \*Corresponding author; E-mail: [t.hope@ucl.ac.uk](mailto:t.hope@ucl.ac.uk)

14  
15     **Short title: Predicting anomia treatment responses**

16     **Corresponding author:** Thomas Hope, [t.hope@ucl.ac.uk](mailto:t.hope@ucl.ac.uk), Institute of Cognitive  
17     Neuroscience, 17-19 Queen Square, London WC1N 3AR.

18     **References:** 36

19     **Words:** (abstract): 297; (body): 4,795

20

21

22 **Abstract**

23 **BACKGROUND:** Stroke is a leading cause of disability, and language impairments (aphasia)  
24 after stroke are both common and particularly feared. Most stroke survivors with aphasia  
25 exhibit anomia (difficulties with naming common objects), but while many therapeutic  
26 interventions for anomia have been proposed, treatment effects are typically much larger in  
27 some patients than others. Here, we asked whether that variation might be more systematic,  
28 and even predictable, than previously thought.

29 **METHODS:** 18 patients, each at least 6 months after left hemisphere stroke, engaged in a  
30 computerised treatment for their anomia over a 6 week period. Using only: (a) the patients'  
31 initial accuracy when naming (to-be) trained items; (b) the hours of therapy that they devoted  
32 to the therapy; and (c) whole-brain lesion location data, derived from structural MRI; we  
33 developed Partial Least Squares regression models to predict the patients' improvements on  
34 treated items, and tested them in cross-validation.

35 **RESULTS:** Somewhat surprisingly, the best model included only lesion location data and the  
36 hours of therapy undertaken. In cross-validation, this model significantly out-performed the  
37 null model, in which the prediction for each patient was simply the mean treatment effect of  
38 the group. This model also made promisingly accurate predictions in absolute terms: the  
39 correlation between empirical and predicted treatment response was 0.62 (95%CI: 0.27, 0.95).

40 **DISCUSSION:** Our results indicate that individuals' variation in response to anomia treatment  
41 are, at least somewhat, systematic and predictable, from the interaction between where and  
42 how much lesion damage they have suffered, and the time they devoted to the therapy.

43

## 44        **1. Introduction**

45        Stroke is a leading cause of disability [1], and language impairments (aphasia) after stroke are  
46        both common [2] and particularly feared [3]. Most stroke survivors with aphasia exhibit  
47        anomia, a difficulty finding words when naming common objects [4], but while many  
48        therapeutic interventions for anomia have been proposed, treatment effects typically vary,  
49        substantially, from patient to patient [5]. Inter-individual variation in treatment responses is  
50        ubiquitous in medicine (e.g. in psychiatry and pharmacology, respectively [6, 7]), but emerging  
51        evidence suggests that variation in responses to therapy for aphasia after stroke might be more  
52        systematic than previously thought [5, 8, 9]. To the extent that this is true, the implication is  
53        that we can use pre-treatment (e.g. behavioural and / or brain imaging) data to explain and even  
54        predict patients' likely treatment responses.

55                For example, we recently showed that a model derived from: (a) pre-treatment scores  
56        on standardised cognitive and language tasks; and (b) lesion location data, derived from pre-  
57        treatment structural MRI, could be used to predict 23 aphasic stroke patients' responses to a  
58        treatment for acquired reading impairments (central alexia) [8]. Like the treatment considered  
59        here, for anomia, this earlier treatment for alexia was a computerised application designed to  
60        engage participants in massed practice of trained items at home, over a period of weeks. Using  
61        stepwise forward feature selection, we selected specific predictors from the pre-treatment data  
62        for entry into a multiple linear regression model, which explained over 90% of the variance in  
63        patients' empirical treatment responses. This result is biased by over-fitting, because all of the  
64        patients' data were used to select features, but even when the feature selection was nested  
65        within each fold of a leave-one-out cross-validation process (i.e. removing the bias), the  
66        resulting predictions were significantly correlated with patients' empirical treatment responses  
67        ( $r = 0.48$ ,  $p < 0.05$ ) [8].

68 In what follows, we add to the evidence that responses to aphasia treatment might be  
69 predictable from patients' pre-treatment data. Here, we focus on a computerised treatment for  
70 naming difficulties (anomia) that is the most common language impairment after stroke [4].  
71 This treatment's effectiveness at the group level has already been verified [10]; here, we  
72 attempt to explain and predict the same treatment effects at the individual level. Our main  
73 hypothesis was that the individual patients' responses to the treatment are systematic and  
74 predictable given where and how much lesion damage they had suffered. We tested this by  
75 comparing predictions made by models derived from those data (alone or in combination  
76 with their pre-treatment anomia severity, demographic data and the hours that they devoted to  
77 the therapy), to the predictions made by a 'null' model, which simply predicts the mean  
78 treatment response of its training sample. If (any of) the former are significantly more  
79 accurate than the latter, the implication is that individual variation in responses to this  
80 treatment is systematic and predictable, at least to some extent.

81

## 82 **2. Methods**

83 The current analysis employs pre-treatment: (a) demographic data (age at stroke onset, time  
84 post-stroke at assessment, and sex); (b) patients' initial impairment severity (i.e. their  
85 accuracies when naming to-be-treated items, pre-treatment; (c) the hours of therapy actually  
86 undertaken; and (d) structural MRI, which we use to extract lesion location data. We use  
87 these data to predict and explain patients' responses to therapy, measured as the absolute  
88 change in naming accuracy, from pre- to post-treatment, for 'trained' items (i.e. items  
89 practiced during the therapy).

90 The therapy was designed to engage participants in massed practice of object naming,  
91 over a 6 week period at home. A variety of phonemic cues (e.g. an audio recording of the

92 object's name, or of the name's first phoneme) were presented concurrently with the picture  
93 to be named during treatment to encourage error-reducing learning. The approach was both  
94 effective and specific to spoken word production, significantly improving patients' overall  
95 object naming accuracy and reaction time immediately post-treatment (unstandardized effect  
96 size: 29% and 17%, respectively; Cohen's *d*: 3.45 and 1.83). Longer term gains in naming  
97 were maintained three months later, though in this study we focus only on the immediate  
98 gains made for items trained during the therapy.

## 99 **2.1 Participants**

100 The study participants were 18 right-handed native English-speakers, with normal  
101 hearing, no history of psychiatric disease and no prior history of neurological disorder before  
102 suffering a left-hemisphere stroke, causing language impairment (aphasia). Participants were  
103 recruited either from an aphasia clinic, run by JC, or via the Predicting Language Outcomes  
104 After Stroke (PLORAS) study, run by CJP, between 2009 and 2012. The study size was  
105 arrived at via a power calculation based on the expected effect size of the treatment  
106 considered.

107 Participants were only included if they had: (i) naming difficulties (anomia), as assessed  
108 via the Boston Naming Test (cut-off <56); (ii) relatively preserved single-word  
109 comprehension as assessed via the Comprehensive Aphasia Test (CAT) [11]; (iii) good  
110 mono-syllabic word repetition as assessed via the Psycholinguistic Assessments of Language  
111 Processing in Aphasia [12]; (iv) no speech apraxia as determined by the Apraxia Battery for  
112 Adults [13]; and, (v) at least partially spared left inferior frontal cortex (thought to support  
113 speech re-learning [10]). All gave written informed consent to take part in the study, which  
114 was approved by the Central London Research Ethics Committee and conducted in

115 accordance with the ethical principles stated by the Declaration of Helsinki. A table of the  
116 participants' key characteristics, reproduced from [10], is included in supplementary material.

## 117 **2.2 Stimuli and procedure**

118 The procedure for the treatment study [10] involved behavioural assessments and  
119 neuroimaging data acquisition both pre- and post-treatment. Here, we use pre-treatment data  
120 only, to predict treatment response, calculated as the change in the number of trained items  
121 that patients could name correctly.

122 Stimuli were drawn from a pool consisting of 299 black and white line drawings of  
123 objects adapted from the International Picture-Naming Project  
124 (<https://crl.ucsd.edu/experiments/ipnp/>). All object names were monosyllabic, with a  
125 consonant-vowel-consonant structure and high name agreement (e.g. 'car'). The treatment  
126 employed 150 of the 299 stimuli: i.e. for each patient, there were 150 treated items and 149  
127 untreated items. 54/150 to-be-trained items and 53/149 un-trained items were kept common  
128 across all patients (for use in an fMRI experiment [10], which we do not consider here). The  
129 remaining items (96/150 to be trained; 95 /150 to be untrained) were determined for each  
130 patient on the basis of their individual pre-treatment naming performance (accuracy) on the  
131 299 items, to match each patient's pre-treatment performance on treated and untreated lists,  
132 respectively.

133 After baseline assessment and pre-treatment structural MRI, patients were given a laptop  
134 and asked to complete a minimum of two hours of naming practice 5 days a week, over a six-  
135 week period. The pictures and auditory cues were presented using the 'StepByStep' aphasia  
136 treatment software (<http://www.aphasia-software.com>). The naming practice was designed to  
137 be completed in an error-reducing manner [14]. For example, in naming a picture of a car the

138 patient was asked to name it three times: (i) after a whole word auditory cue /ka:r/; (ii) after  
139 an initial phonemic cue /ka/; (iii) after a whole word cue again. Only then would the patient  
140 proceed to the next item to be named. Patients completed on average a total of 73 ( $\pm$  25)  
141 hours of naming practice: i.e. within one standard deviation of the mean therapy dose found,  
142 in a meta-analysis of aphasia treatment studies [15], to improve patients' communicative  
143 ability. After the six-week period, patients were assessed again exactly as at baseline. Naming  
144 accuracy was scored according to the standardized Comprehensive Aphasia Test guidelines  
145 [11]. Our analyses here are separately focused on absolute change in naming accuracy (from  
146 pre- to post-treatment) on the 150 treated items.

### 147 **2.3 Imaging acquisition and analysis**

148 The same scanner and hardware were used for the acquisition of all images. Whole-brain  
149 imaging was performed on a 3 T Siemens TIM-Trio system (Siemens) at the Wellcome  
150 Centre for Human Neuroimaging. Lesion images were derived from structural MRI using the  
151 Automatic Lesion Identification toolbox [16], and then double-checked for accuracy by a  
152 researcher experienced in manual lesion-tracking (DN), , working on individual axial slices.

153 Lesion data were then encoded as lesion load in a series of 398 anatomically defined  
154 regions of interest, derived from four publicly available atlases (two focused on grey matter  
155 and two focused on white matter) [17-20]. Where regions were represented in probabilistic  
156 format, they were re-encoded as binary images at a 50% threshold. For each region, lesion  
157 load was calculated as the number of ( $2\text{mm}^3$ ) voxels shared by the lesion and the region,  
158 divided by the total number of voxels in that region. Notably, there was significant overlap  
159 between these regions, across atlases. Rather than deciding *a priori* what the best or most  
160 useful atlas might be, our goal was simply to reduce the dimensionality of the lesion data in a  
161 manner that retained an explicit link with familiar brain regions and / or tracts.

162

## 163 **2.4 Modelling Methods**

164 Our key aim here was to assess whether individual patients' treatment responses could be  
165 predicted from pre-treatment data alone. Here, we define 'treatment responses' as the  
166 absolute change in patients' naming accuracies from pre- to post-treatment.

167 Treatment studies in this domain are resource intensive and typically involve massed  
168 practice, so take time to complete. Like most others in the field, our sample is therefore  
169 smaller (n=18) than is usually desirable when building predictive models, increasing the risk  
170 of over-fitting. That risk is further increased because we have so much pre-treatment data to  
171 consider, including behavioural data, and lesion data derived from structural MRI.

172 One way to manage this risk is via feature selection, as we employed in similar, previous  
173 work [8]. But though successful, that work still revealed significant over-fitting, because our  
174 in-sample results (using the whole dataset to select features) were so much stronger than our  
175 out-of-sample results (i.e. nesting feature selection in cross-validation):  $R^2$  (predicted  
176 response, empirical response) = 0.94 (in-sample); 0.23 (out-of-sample). Accordingly, we took  
177 a simpler approach in this work by using dimensionality reduction, rather than feature  
178 selection, to manage the high dimensionality of the pre-treatment (behavioural and brain  
179 imaging) predictors.

### 180 **2.4.1 Predictive models**

181 We used Partial Least Squares (PLS) regression, as implemented in Matlab 2019a, to develop  
182 our models, using either: (a) demographic variables, including age at stroke onset, sex and  
183 time post-stroke; (b) pre-treatment naming accuracy (i.e. measuring the initial severity of  
184 each patient's anomia); and / or (c) lesion data, derived from pre-treatment structural MRI.



185 We additionally considered one further variable, both singly and in combination with the  
186 other data: the hours of therapy actually completed by each patient. There were no missing  
187 data for any patient for any of these variables. All predictor variables were standardised (z-  
188 scored) prior to entry into models.

189 PLS regression is appropriate, here, because it employs dimensionality reduction  
190 analogous to, but more efficient than, that implemented by Principal Components Analysis  
191 (PCA): i.e. where PCA identifies latent variables which explain maximal variance in the  
192 predictors, PLS regression identifies variables that explain maximal variance in the response  
193 variable(s). PLS regression thus allows us to build potentially effective models that are (at  
194 least somewhat) robust to irrelevant predictors, rather than excluding those predictors  
195 explicitly.

196 The behavioural model employed 28 predictors: i.e. scores on our battery of pre-  
197 treatment language and cognitive assessments (as described in detail in [10]). The lesion data  
198 were encoded as described previously, into 398 lesion load variables: however, all patients  
199 had left-hemisphere lesions, and in fact all patients had zero lesion load in 220/398 regions.  
200 These were removed from the analysis (leaving 178 variables), but their removal had no  
201 substantive effect on the results. We trained models employing predictors derived from each  
202 data type separately, and all higher order combinations of data types.

203

#### 204 **2.4.2 Model assessment and model comparison**

205 Predictive performance was assessed with cross-validation. We report results using 1,000  
206 times 10-fold cross-validation here, but analyses employing different types of cross-  
207 validation were substantially similar. Absolute measures of predictive performance are  
208 suspect in small samples, so we assessed our models in relative terms, by comparing them to

209 an empty, or baseline (i.e. null) model, which simply predicts the average treatment response  
210 for all patients in the group. This model reflects our null hypothesis, that treatment responses  
211 are *not predictable at the individual level*, leaving group-level averages as the only recourse.  
212 When our empirical models outperform the empty model, we reject the null hypothesis,  
213 concluding that individual treatment responses are predictable, at least to some extent. We  
214 compare models by recording the Root Mean Squared Error (MSE) for predictions made in  
215 each of 1,000 repetitions of a 10-fold cross-validation. These folds are kept identical across  
216 models, so the MSE values can be compared pair-wise.

217 Traditional paired tests are not appropriate on their own here because different partitions  
218 of the data will create overlapping training datasets, which are therefore not independent of  
219 each other. Accordingly, while we use the traditional, paired, non-parametric Wilcoxon  
220 signed rank test to compare MSEs across models, we further threshold those statistics with  
221 paired permutation test. The test construes the two vectors to be compared as having labels,  
222 reflecting the models used to generate them. The null hypothesis is that those labels are  
223 arbitrary, because the models' performance do not differ except by chance. We therefore  
224 create a null distribution of paired test statistics by randomly permuting those labels *within*  
225 *each pair*, and repeating the original paired (signed rank) test. If the original statistic is  
226 extreme relative to the null distribution, we conclude that the performance difference between  
227 the models is significant ( $p < 0.05$ ) after a correction for FamilyWise Error (FWE).

228

### 229 **2.4.3 Model interpretation**

230 PLS regression models can be interpreted by examining the weights of each of their  
231 components on each of the original variables. However, this approach can be challenging  
232 when there are multiple components to consider, and because the sign of each component is

233 arbitrary: i.e. positive weights on a given component do not necessarily imply a positive  
234 relationship between the highly weighted independent variables and the dependent  
235 variable(s). We circumvent these issues with ‘data perturbation’.

236 The data perturbation procedure involves permuting random subsamples of the empirical  
237 independent variables and recording the effect of the perturbation on the model’s predictions.  
238 The PLS model beta weights themselves are fixed based on the original empirical data: our  
239 goal is not to fit further models, but rather to better understand the relationships that have  
240 already been encoded. We do this by: (a) permuting random subsets of the independent  
241 variables; (b) observing the effect on the models’ predictions; and (c) relating perturbed  
242 variable values to the resulting predictions with mass univariate correlation analyses. The  
243 resultant correlation coefficients approximate the influence that each variable has on the  
244 model’s predictions. We ran 1,000 iterations of the process per model, yielding a total sample  
245 size of 18 (patients) \* 1,000 (iterations), including both perturbed independent variables and  
246 the resultant, predicted dependent variable (treatment response). Repeated analyses with this  
247 number of iterations yielded very consistent coefficients for all of the models we report  
248 across ten repetitions of 1,000 iterations of this process, all pairwise correlations between  
249 derived weights on behavioural and lesion variables were  $>0.99$ .

250

### 251 **3. Results**

#### 252 **3.1 Predictive performance**

253 Table 1 reports predictive performances (median and inter-quartile ranges of Mean Square  
254 Errors, or MSEs) of models driven by all combinations of the data we considered. All but one  
255 of the models that out-performed the null model, with lower MSEs, included lesion data. The  
256 exception was a model including hours of therapy only, with a median MSE of 300 (IQR =

257 16): i.e. a very small difference relative to the null model, albeit a significant one (FWE  
 258 adjusted  $p < 0.05$ ). The best combination was hours of therapy plus lesion data (MSE median  
 259 / inter-quartile range = 182 / 21), and indeed this was the only combination which improved  
 260 upon lesion data alone: see Table 1. The mean predictions of that best model, across the  
 261 1,000 repetitions, were strongly and significantly correlated with empirical treatment  
 262 responses ( $r = 0.62$ ,  $p = 0.006$ , 95% CI = 0.27, 0.95): see Figure 1.

263

**Figure 1:** Predicted responses versus empirical responses, for the best model identified in Table 1 (lesion load variables + hours of therapy undertaken).

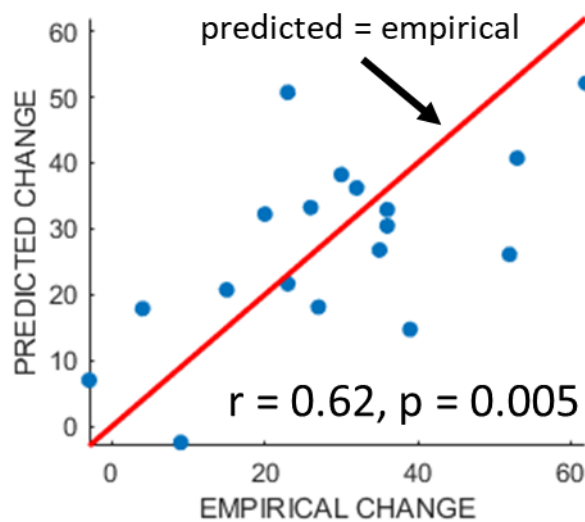

264

265

| <b>Data types</b>            | <b>Median / IQR MSE</b> |
|------------------------------|-------------------------|
| Null                         | 303/16                  |
| Hrs (Therapy)                | 300/16                  |
| Initial (severity)           | 396/31                  |
| Demographics                 | 321/24                  |
| Lesions                      | 205/30                  |
| Initial + Hrs                | 364/30                  |
| Demographics + Hrs           | 316/26                  |
| <b><u>Lesions + Hrs</u></b>  | <b><u>182/21</u></b>    |
| Initial + Demographics       | 364/30                  |
| Initial + Lesions            | 253/29                  |
| Lesions + Demographics       | 267/21                  |
| Hrs + Initial + Demographics | 355/30                  |
| Hrs + Initial + Lesions      | 220/32                  |
| Hrs + Demographics + Lesions | 253/21                  |

|                                        |        |
|----------------------------------------|--------|
| Initial + Demographics + Lesions       | 274/23 |
| Hrs + Initial + Demographics + Lesions | 261/23 |

266

267 **Table 1:** Data configurations and predictive performance, as assessed across the same 1,000  
268 10-fold cross-validation runs. MSE = Mean Squared Errors of the model predictions; IQR =  
269 Inter-Quartile Range of the model predictions. These quantities are employed in preference to  
270 mean and standard deviation because MSEs typically have a Poisson distribution rather than  
271 a normal distribution. Lower MSEs imply more accurate predictions. The best model  
272 configuration is underlined (Hrs + Lesions): the most accurate predictions are derived from  
273 these data.

274

275

### 276 **3.2 Interpreting the best model**

277 Variable weights for the best models predicting change on treated items, using a combination  
278 of the hours of therapy undertaken and lesion location data, were calculated via data  
279 perturbation, as described in the Methods.

280 First, as expected, the best model predicted better improvement when patients devoted  
281 more hours to practice ( $r = 0.33$ ). Regional weights for the lesion data in this model (i.e.  
282 taking therapy hours into account) are displayed in Figure 2, with the most negative weights  
283 (predicting lesser treatment benefit with more damage) in and around the left inferior frontal  
284 gyrus, and positive weights (predicting greater treatment benefit with more damage) in the  
285 middle, superior and anterior temporal lobe regions. Where voxels appear in two overlapping  
286 regions with different weights (e.g. we had one region covering the whole of the  
287 hippocampus and others covering only its cornu ammonis and dentate gyrus subfields), the  
288 most extreme of those two weights is displayed.

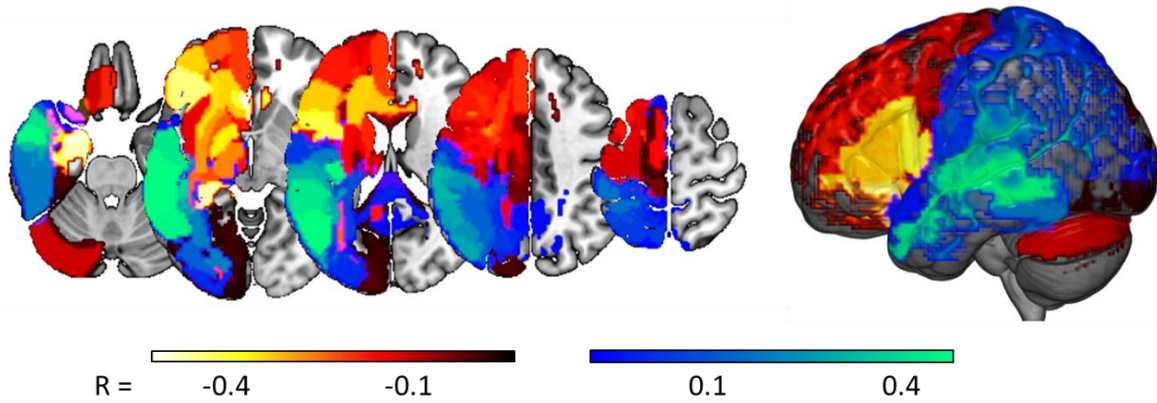

289

290 **Figure 2: Relating lesion locations to predicted treatment responses.** Correlation  
291 coefficients, derived via data perturbation, relating the lesion load in each of 177 regions, to  
292 treatment responses predicted by our best model (appending lesion data to the hours of  
293 therapy actually undertaken).

294

295 Notably, weights in many brain areas, including the auditory cortex and the superior,  
296 middle and anterior temporal lobes, are positive. The potentially curious implication here, is  
297 that more damage predicts larger treatment responses. Instead, we suggest that these positive  
298 regions are driven by the contingent distribution of the patients' lesions: more damage in  
299 those positively weighted regions implies less damage in the negatively weighted regions  
300 (where the latter make the more intuitive association between more damage and smaller  
301 treatment responses). As an illustration of this relationship, we considered area TE11 of the  
302 primary auditory cortex, where the strongest, positive weight was observed (0.47). Pairwise  
303 correlations, between lesion loads in this region and lesion loads in each of the other (177)  
304 regions under consideration, were very strongly correlated with the weights displayed in  
305 Figure 2, which were assigned to those regions by our best PLS regression model ( $r = 0.90$ ):  
306 see Figure 3.

307

308

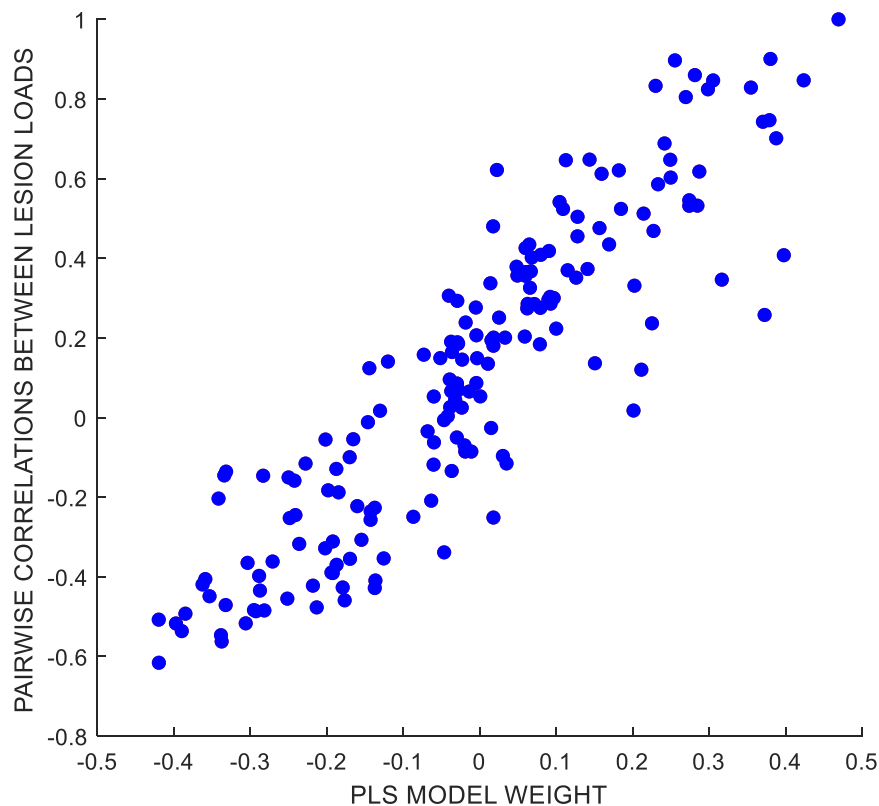

309

310 **Figure 3:** Scatter plot relating: (i) coefficients of the pairwise correlations between lesion  
311 load values in primary auditory cortex area TE11, and lesion loads in all of the 177 brain  
312 regions that we considered (y-axis); to (ii) the weights assigned to each of those same brain  
313 regions by our best PLS regression model, as derived via data perturbation (described in the  
314 Methods). The strong correlation between these two quantities implies that lesser lesion load  
315 in primary auditory cortex area TE11 serves as a proxy for greater lesion load in areas where  
316 that extra damage most strongly predicts poorer treatment responses.

317

#### 318 4. Discussion

319 Recent results suggest that individual stroke patients' responses to aphasia treatment are to  
320 some extent systematic and predictable [8]. Our results add to this evidence, showing that  
321 responses to a behavioural treatment for anomia are at least somewhat predictable at the

322 individual level. We assessed models derived from demographic variables, and from pre-  
323 treatment behavioural and lesion data. Models were derived via PLS regression, drawing on  
324 efficient predictor dimensionality reduction and thus obviating the need for either algorithmic  
325 or *a priori* feature selection. These models provide a sound way to establish at an individual  
326 level whether pre-treatment data include signals that might be used to predict treatment  
327 responses.

328         Many of the models we tested made significantly better predictions than those of a  
329 baseline model, in which each patient's prediction was simply the mean response of the  
330 group (see Table 1). However, the best model employed lesion location data, derived from  
331 MRI, plus the hours of therapy undertaken by each patient. As hours of therapy alone has  
332 very little predictive power, the results suggest that the benefit of increased therapy depends  
333 on lesion location. This may explain why detecting therapy dose effects has been so  
334 challenging [21]. Notably, we could not predict training effort, as indexed by hours of  
335 therapy undertaken at the individual level, from any of the other data considered here.

336         Our best prognostic model, including lesion data and hours of therapy, is broadly  
337 sensible. The negative weights assigned to the left inferior frontal gyrus, the hippocampus  
338 and the cerebellum (more damage = less improvement) are consistent with prior work  
339 emphasising the importance of the preservation of these regions in the response to aphasia  
340 therapy (e.g. [22-24]). And the positive weights may best be explained as emphasising those  
341 regions where more extensive damage predicts better preservation of the regions that appear  
342 to support better responses to treatment (see Figure 3).

343         Notably, we did not employ any feature selection in this work: i.e. we did not attempt  
344 to select the subset of lesion location variables that might best explain the patients' treatment  
345 responses. This is a limitation of the current work, made necessary because feature selection



346 encourages over-fitting in small samples [8]: the only general way to circumvent this issue is  
347 via external validation: testing the best model from this study in a second, completely  
348 independent sample. But this is no simple endeavour, because the time and effort required to  
349 run these studies is substantial, and we do not yet know how similar such a study would need  
350 to be to that reported here. Does the treatment have to stay exactly the same? How much can  
351 the inclusion criteria vary? Work to address these questions, by measuring how prognostic  
352 models generalise across independent samples (e.g. as in [25]) and different therapy studies,  
353 is ongoing.

354         Perhaps surprisingly, our models did not benefit from the addition, either of the initial  
355 severity or the demographic data that we considered – suggesting that this treatment’s  
356 efficacy did not depend on the patients’ ages, sex, time post-stroke or pre-treatment  
357 impairment severity (once lesion location had been taken into account). Whether these null  
358 results generalise in larger samples, is a question for future work. But our results do suggest  
359 that pre-treatment structural neuroimaging (lesion data), in combination with treatment dose,  
360 can be used to predict individual patients’ therapeutic anomia intervention response. This is  
361 consistent with prior results, suggesting that the individual responses to treatment for aphasic  
362 stroke might interact with where and how much lesion damage individual patients have  
363 suffered [8]. We hope that these results will encourage further attempts to explain and predict  
364 inter-individual differences in treatment responses, with pre-treatment data, opening the way  
365 for a more positive and personalised treatment approach for aphasia.

366

## 367 **ACKNOWLEDGMENTS**

368 This study was supported by Wellcome (203147/Z/16/Z; 205103/Z/16/Z; 106161/Z/14/Z),  
369 MRC (G0701888), the Stroke Association (TSA PDF 2017/02) and NIHR (RP-2015-06-012).  
370 The funders had no participation in the design and results of this study.

371

372 **DATA**

373 The data described in this study is available to accredited researchers from JC, on request.

374

375

376 **REFERENCES**

- 377 1. Corraini, P., et al., *Comorbidity and the increased mortality after hospitalization for stroke: a*  
378 *population-based cohort study*. J Thromb Haemost, 2018. **16**(2): p. 242-252.
- 379 2. Engelter, S.T., et al., *Epidemiology of aphasia attributable to first ischemic stroke: incidence,*  
380 *severity, fluency, etiology, and thrombolysis*. Stroke, 2006. **37**(6): p. 1379-84.
- 381 3. Lam, J.M. and W.P. Wodchis, *The relationship of 60 disease diagnoses and 15 conditions to*  
382 *preference-based health-related quality of life in Ontario hospital-based long-term care*  
383 *residents*. Med Care, 2010. **48**(4): p. 380-7.
- 384 4. Laine, M. and N. Martin, *Anomia: Theoretical and clinical aspects*. 2013: Psychology Press.
- 385 5. Crinion, J.T. and A.P. Leff, *Using functional imaging to understand therapeutic effects in*  
386 *poststroke aphasia*. Current Opinion in Neurology, 2015. **28**(4): p. 330-337.
- 387 6. Helldin, L., et al., *Neurocognitive variability in schizophrenia spectrum disorders: relationship*  
388 *to real-world functioning*. Schizophrenia Research: Cognition, 2020. **20**: p. 100172.
- 389 7. Kadiev, E., et al., *Role of pharmacogenetics in variable response to drugs: focus on opioids*.  
390 Expert opinion on drug metabolism & toxicology, 2008. **4**(1): p. 77-91.
- 391 8. Aguilar, O.M., et al., *Lesion-site-dependent responses to therapy after aphasic stroke*. Journal  
392 of Neurology, Neurosurgery & Psychiatry, 2018.
- 393 9. Lambon Ralph, M.A., et al., *Predicting the outcome of anomia therapy for people with aphasia*  
394 *post CVA: Both language and cognitive status are key predictors*. Neuropsychological  
395 Rehabilitation, 2010. **20**(2): p. 289-305.
- 396 10. Nardo, D., et al., *Less is more: neural mechanisms underlying anomia treatment in chronic*  
397 *aphasic patients*. Brain, 2017. **140**(11): p. 3039-3054.
- 398 11. Swinburn, K., Porter, G., and Howard, D., *Comprehensive Aphasia Test*. 2004: Psychology  
399 Press.
- 400 12. Kay, J., R. Lesser, and M. Coltheart, *Psycholinguistic assessments of language processing in*  
401 *aphasia (PALPA)*. Hove, UK: Laurence Erlbaum Associates, 1992.
- 402 13. Dabul, *Apraxia battery for adults (second ed.)*. 2000, Austin, Texas: Pro-Ed.
- 403 14. Fillingham, J.K., K. Sage, and M.A. Lambon Ralph, *The treatment of anomia using errorless*  
404 *learning*. Neuropsychological Rehabilitation, 2006. **16**(2): p. 129-154.
- 405 15. Bhogal, S.K., R. Teasell, and M. Speechley, *Intensity of aphasia therapy, impact on recovery*.  
406 Stroke, 2003. **34**(4): p. 987-93.
- 407 16. Seghier, M.L., et al., *Lesion identification using unified segmentation-normalisation models*  
408 *and fuzzy clustering*. Neuroimage, 2008. **41**(4): p. 1253-66.
- 409 17. Tzourio-Mazoyer, N., et al., *Automated Anatomical Labeling of Activations in SPM Using a*  
410 *Macroscopic Anatomical Parcellation of the MNI MRI Single-Subject Brain*. NeuroImage, 2002.  
411 **15**(1): p. 273-289.
- 412 18. Hua, K., et al., *Tract probability maps in stereotaxic spaces: analyses of white matter anatomy*  
413 *and tract-specific quantification*. Neuroimage, 2008. **39**(1): p. 336-47.
- 414 19. Oishi, K.F., A. F.; van Zijl P. C. M.; Mori, S., *MRI Atlas of Human White Matter*. Vol. 2. 2011.
- 415 20. Eickhoff, S.B., et al., *A new SPM toolbox for combining probabilistic cytoarchitectonic maps*  
416 *and functional imaging data*. Neuroimage, 2005. **25**(4): p. 1325-35.
- 417 21. Harvey, S., et al., *Dose effects in behavioural treatment of post-stroke aphasia: a systematic*  
418 *review and meta-analysis*. Disability and Rehabilitation, 2020: p. 1-12.
- 419 22. Sebastian, R., et al., *Cerebellar tDCS: A Novel Approach to Augment Language Treatment Post-*  
420 *stroke*. Frontiers in human neuroscience, 2017. **10**: p. 695-695.
- 421 23. Mattioli, F., et al., *Early Aphasia Rehabilitation Is Associated With Functional Reactivation of*  
422 *the Left Inferior Frontal Gyrus*. Stroke, 2014. **45**(2): p. 545-552.

- 423 24. Meinzer, M., et al., *Integrity of the hippocampus and surrounding white matter is correlated*  
424 *with language training success in aphasia*. *Neuroimage*, 2010. **53**(1): p. 283-90.  
425 25. Loughnan, R., et al., *Generalizing post-stroke prognoses from research data to clinical data*.  
426 *NeuroImage: Clinical*, 2019. **24**: p. 102005.

427

428

429 Supplementary Table S1: Demographic and clinical data of the patients

| Patient ID       | Sex | Age                       | Lesion volume (cm <sup>3</sup> ) | Months post-stroke | BNT            | CAT            | PALPA 9       | PALPA 8      | Hours of training |
|------------------|-----|---------------------------|----------------------------------|--------------------|----------------|----------------|---------------|--------------|-------------------|
| P1               | M   | 64                        | 171                              | 78                 | 47             | 15             | 20            | 6            | 40                |
| P2               | F   | 49                        | 44                               | 17                 | 12             | 15             | 21            | 6            | 31                |
| P3               | M   | 54                        | 294                              | 78                 | 14             | 11             | 10            | 0            | 77                |
| P4               | M   | 41                        | 234                              | 65                 | 28             | 14             | 24            | 8            | 116               |
| P5               | M   | 49                        | 144                              | 57                 | 34             | 15             | 17            | 2            | 50                |
| P6               | M   | 66                        | 109                              | 61                 | 52             | 15             | 24            | 6            | 63                |
| P7               | F   | 44                        | 82                               | 72                 | 34             | 14             | 24            | 10           | 59                |
| P8               | M   | 54                        | 95                               | 34                 | 35             | 15             | 24            | 8            | 70                |
| P9               | M   | 67                        | 341                              | 47                 | 42             | 14             | 24            | 9            | 85                |
| P10              | M   | 41                        | 75                               | 8                  | 23             | 13             | 23            | 8            | 89                |
| P11              | M   | 63                        | 139                              | 264                | 51             | 15             | 24            | 9            | 81                |
| P12              | M   | 47                        | 314                              | 52                 | 16             | 15             | 22            | 6            | 77                |
| P13              | M   | 56                        | 150                              | 40                 | 1              | 14             | 18            | 2            | 61                |
| P14              | F   | 60                        | 104                              | 121                | 27             | 13             | 22            | 7            | 120               |
| P15              | M   | 41                        | 114                              | 18                 | 42             | 14             | 21            | 3            | 43                |
| P16              | F   | 21                        | 155                              | 33                 | 18             | 15             | 20            | 3            | 108               |
| P17              | F   | 47                        | 161                              | 53                 | 9              | 9 <sup>a</sup> | 12            | 0            | 76                |
| P18              | F   | 43                        | 165                              | 5                  | 21             | 15             | 23            | 1            | 67                |
| <b>Mean (SD)</b> |     | <b>50 (12)</b>            | <b>161 (84)</b>                  | <b>61 (58)</b>     | <b>28 (15)</b> | <b>14 (2)</b>  | <b>21 (4)</b> | <b>5 (3)</b> | <b>73 (25)</b>    |
|                  |     | <b>Max score possible</b> |                                  |                    | <b>60</b>      | <b>15</b>      | <b>24</b>     | <b>10</b>    |                   |

430

431

432 TRIPOD checklist for prediction model development.

| Section/Topic                |     | Checklist Item                                                                                                                                                                                        | Page |
|------------------------------|-----|-------------------------------------------------------------------------------------------------------------------------------------------------------------------------------------------------------|------|
| <b>Title and abstract</b>    |     |                                                                                                                                                                                                       |      |
| Title                        | 1   | Identify the study as developing and/or validating a multivariable prediction model, the target population, and the outcome to be predicted.                                                          | X    |
| Abstract                     | 2   | Provide a summary of objectives, study design, setting, participants, sample size, predictors, outcome, statistical analysis, results, and conclusions.                                               | X    |
| <b>Introduction</b>          |     |                                                                                                                                                                                                       |      |
| Background and objectives    | 3a  | Explain the medical context (including whether diagnostic or prognostic) and rationale for developing or validating the multivariable prediction model, including references to existing models.      | X    |
|                              | 3b  | Specify the objectives, including whether the study describes the development or validation of the model or both.                                                                                     | X    |
| <b>Methods</b>               |     |                                                                                                                                                                                                       |      |
| Source of data               | 4a  | Describe the study design or source of data (e.g., randomized trial, cohort, or registry data), separately for the development and validation data sets, if applicable.                               | X    |
|                              | 4b  | Specify the key study dates, including start of accrual; end of accrual; and, if applicable, end of follow-up.                                                                                        | X    |
| Participants                 | 5a  | Specify key elements of the study setting (e.g., primary care, secondary care, general population) including number and location of centres.                                                          | X    |
|                              | 5b  | Describe eligibility criteria for participants.                                                                                                                                                       | X    |
|                              | 5c  | Give details of treatments received, if relevant.                                                                                                                                                     | X    |
| Outcome                      | 6a  | Clearly define the outcome that is predicted by the prediction model, including how and when assessed.                                                                                                | X    |
|                              | 6b  | Report any actions to blind assessment of the outcome to be predicted.                                                                                                                                | X    |
| Predictors                   | 7a  | Clearly define all predictors used in developing or validating the multivariable prediction model, including how and when they were measured.                                                         | X    |
|                              | 7b  | Report any actions to blind assessment of predictors for the outcome and other predictors.                                                                                                            | X    |
| Sample size                  | 8   | Explain how the study size was arrived at.                                                                                                                                                            | X    |
| Missing data                 | 9   | Describe how missing data were handled (e.g., complete-case analysis, single imputation, multiple imputation) with details of any imputation method.                                                  | X    |
| Statistical analysis methods | 10a | Describe how predictors were handled in the analyses.                                                                                                                                                 | X    |
|                              | 10b | Specify type of model, all model-building procedures (including any predictor selection), and method for internal validation.                                                                         | X    |
|                              | 10d | Specify all measures used to assess model performance and, if relevant, to compare multiple models.                                                                                                   | X    |
| Risk groups                  | 11  | Provide details on how risk groups were created, if done.                                                                                                                                             | X    |
| <b>Results</b>               |     |                                                                                                                                                                                                       |      |
| Participants                 | 13a | Describe the flow of participants through the study, including the number of participants with and without the outcome and, if applicable, a summary of the follow-up time. A diagram may be helpful. | X    |
|                              | 13b | Describe the characteristics of the participants (basic demographics, clinical features, available predictors), including the number of participants with missing data for predictors and outcome.    | X    |
| Model development            | 14a | Specify the number of participants and outcome events in each analysis.                                                                                                                               | X    |
|                              | 14b | If done, report the unadjusted association between each candidate predictor and outcome.                                                                                                              | X    |
| Model specification          | 15a | Present the full prediction model to allow predictions for individuals (i.e., all regression coefficients, and model intercept or baseline survival at a given time point).                           | X    |
|                              | 15b | Explain how to use the prediction model.                                                                                                                                                              | X    |
| Model performance            | 16  | Report performance measures (with CIs) for the prediction model.                                                                                                                                      | X    |
| <b>Discussion</b>            |     |                                                                                                                                                                                                       |      |
| Limitations                  | 18  | Discuss any limitations of the study (such as nonrepresentative sample, few events per predictor, missing data).                                                                                      | X    |
| Interpretation               | 19b | Give an overall interpretation of the results, considering objectives, limitations, and results from similar studies, and other relevant evidence.                                                    | X    |
| Implications                 | 20  | Discuss the potential clinical use of the model and implications for future research.                                                                                                                 | X    |
| <b>Other information</b>     |     |                                                                                                                                                                                                       |      |
| Supplementary information    | 21  | Provide information about the availability of supplementary resources, such as study protocol, Web calculator, and data sets.                                                                         | X    |
| Funding                      | 22  | Give the source of funding and the role of the funders for the present study.                                                                                                                         | X    |
